# Supplementary material
Source: MDPI journal article supplement (https://www.mdpi.com/2073-4433/14/1/124)
Supplement: s1 [file s1]

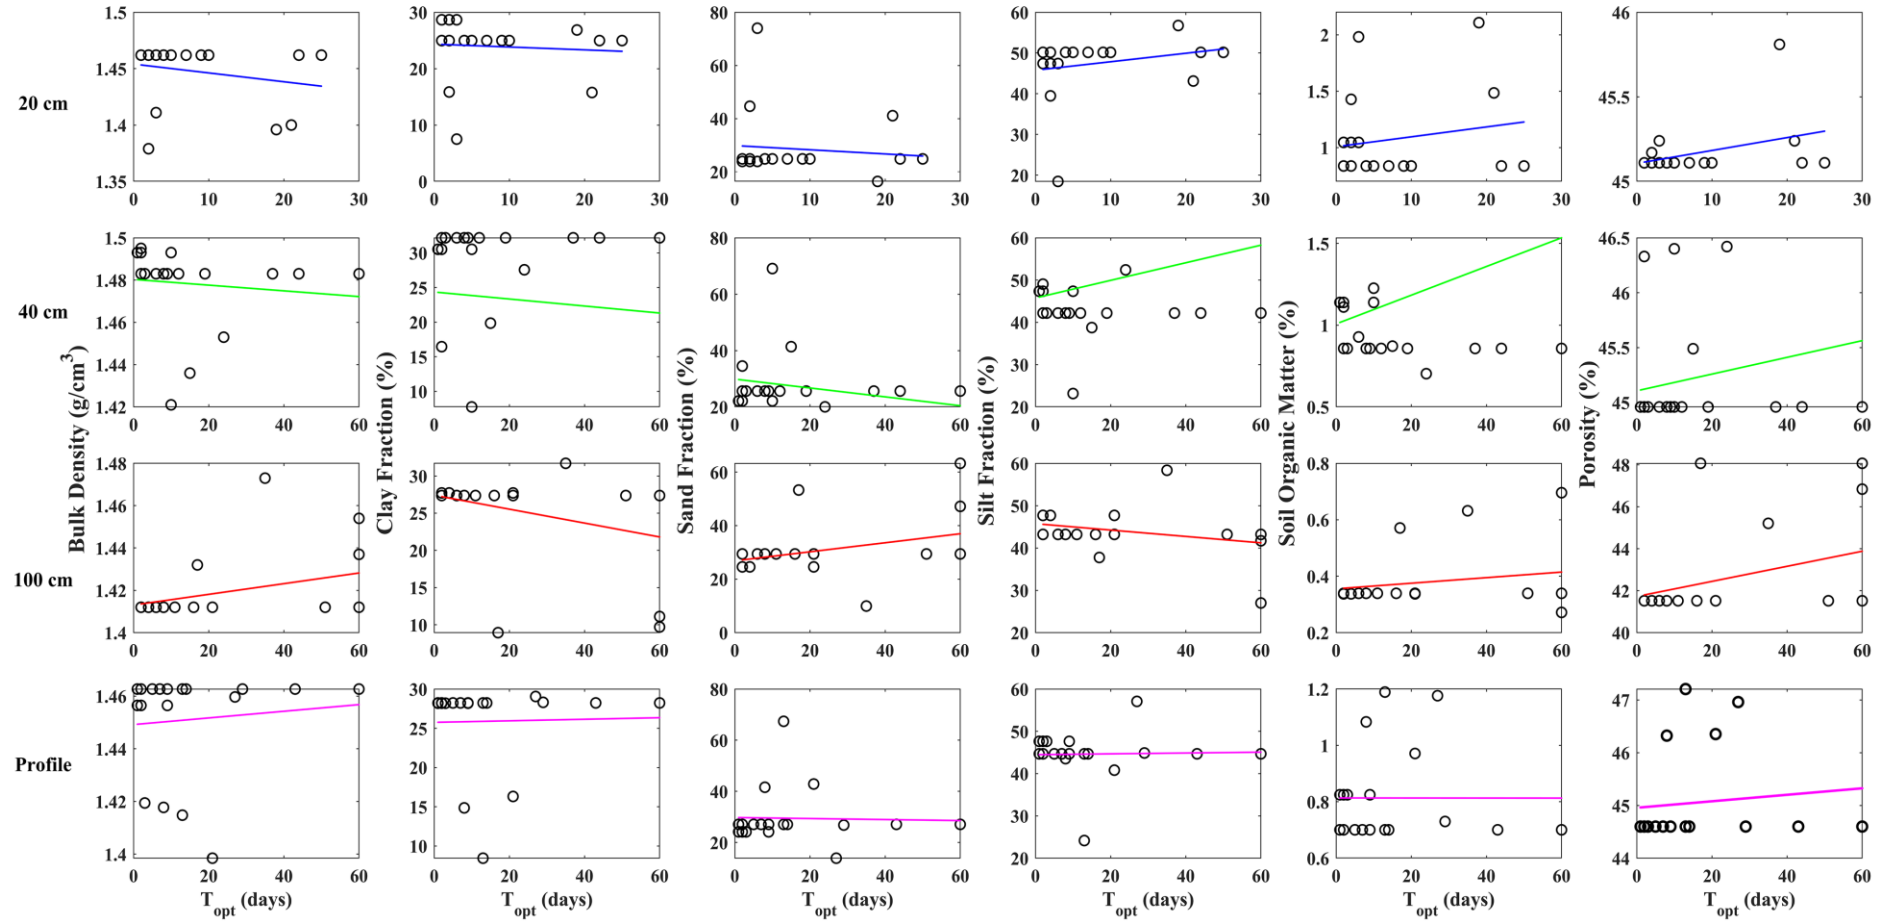

**Figure S1.** Scatter plots between  $T_{opt}$  and various soil properties (bulk density, clay, sand and silt fractions, soil organic matter and porosity). Lines in different color represent the correlated trends between  $T_{opt}$  and soil properties.

**Table S1.** Summary of statistical models between  $T_{opt}$  and annual average precipitation.

| Statistical model | Linear regression                    | Logarithmic function                      | Exponential function                 | Power function                       | Polynomial function                            |
|-------------------|--------------------------------------|-------------------------------------------|--------------------------------------|--------------------------------------|------------------------------------------------|
| 20 cm             | $y = -0.0446x + 55.246$<br>R=-0.61** | $y = -49.08\ln(x) + 349.65$<br>R=-0.61*** | $y = 4013.7e^{-0.006x}$<br>R=0.62*** | $y = 4E^{21}x^{-6.912}$<br>R=0.62*** | $y = 1E^{-4}x^2 - 0.3542x + 223.1$<br>R=0.64   |
| 40 cm             | $y = -0.0785x + 98.136$<br>R=-0.57** | $y = -86.19\ln(x) + 614.97$<br>R=-0.58**  | $y = 23290e^{-0.007x}$<br>R=-0.69*** | $y = 9E^{24}x - 7.929$<br>R=-0.68*** | $y = 2E^{-4}x^2 - 0.5317x + 343.88$<br>R=-0.59 |
| 100 cm            | $y = -0.1116x + 149.18$<br>R=-0.55** | $y = -120.9\ln(x) + 872.67$<br>R=-0.55**  | $y = 27765e^{-0.007x}$<br>R=-0.65*** | $y = 1E^{23}x - 7.215$<br>R=-0.64*** | $y = -7E^{-5}x^2 + 0.031x + 71.848$<br>R=-0.55 |
| 0-100 cm          | $y = -0.0697x + 90.459$<br>R=-0.56** | $y = -75.93\ln(x) + 545.28$<br>R=-0.56**  | $y = 4414.3e^{-0.006x}$<br>R=-0.58** | $y = 2E^{19}x - 5.997$<br>R=-0.54**  | $y = 6E^{-5}x^2 - 0.2049x + 163.78$<br>R=-0.56 |

x denotes annual average precipitation, y denotes  $T_{opt}$  at different soil depths. \*\* denotes correlation coefficient R were significant at  $p < 0.01$ , \*\*\* denotes correlation coefficient R were significant at  $p < 0.001$ .
